# Supplementary material
Source: PubMed Central journal article supplement (PMC7448655)
Supplement: JCM.00644-20-s0001.pdf [file JCM.00644-20-s0001.pdf]

1 SUPPLEMENTAL TABLE. PPA, NPA and concordance rate of the Xpert® Carba-R assay in different Enterobacterales.

2

| Strain type (n)            | Test performance<br>(95% CI) (%) | Genotype                 | No. of specimens by result |      |      |      | Test performance (95% CI) |                    |                    |
|----------------------------|----------------------------------|--------------------------|----------------------------|------|------|------|---------------------------|--------------------|--------------------|
|                            | Concordance Rate                 |                          | P+X+                       | P-X+ | P+X- | P-X- | PPA (%)                   | NPA (%)            | Concordance (%)    |
| <i>C. freundii</i> (4)     | 80.0 (37.6-99.0)                 | <i>Bla<sub>NDM</sub></i> | 2                          | 0    | 0    | 3    | 100.0 (17.8-100.0)        | 100.0 (43.9-100.0) | 100.0 (56.6-100.0) |
|                            |                                  | <i>Bla<sub>KPC</sub></i> | 0                          | 1    | 0    | 4    | NA                        | 80.0 (37.6-99.0)   | 80.0 (37.6-99.0)   |
| <i>K. aerogenes</i> (2)    | 66.7 (11.9-98.3)                 | <i>Bla<sub>NDM</sub></i> | 1                          | 0    | 0    | 2    | 100.0 (5.1-100.0)         | 100.0 (17.8-100.0) | 100.0 (43.9-100.0) |
|                            |                                  | <i>Bla<sub>KPC</sub></i> | 0                          | 1    | 0    | 2    | NA                        | 66.7 (11.9-98.3)   | 66.7 (11.9-98.3)   |
| <i>E. cloacae</i> (23)     | 87.0 (67.9-95.5)                 | <i>Bla<sub>NDM</sub></i> | 5                          | 1    | 0    | 17   | 100.0 (56.6-100.0)        | 94.4 (74.2-99.7)   | 95.7 (79.0-99.8)   |
|                            |                                  | <i>Bla<sub>KPC</sub></i> | 1                          | 1    | 0    | 21   | 100.0 (5.1-100.0)         | 95.5 (78.2-99.8)   | 95.7 (79.0-99.8)   |
|                            |                                  | <i>Bla<sub>VIM</sub></i> | 0                          | 0    | 1    | 22   | 0.0 (0.0-94.9)            | 100.0 (85.1-100.0) | 95.7 (79.0-99.8)   |
| <i>E. coli</i> (22)        | 78.3 (58.1-90.3)                 | <i>Bla<sub>NDM</sub></i> | 8                          | 2    | 1    | 12   | 88.9 (56.5-99.4)          | 85.7 (60.1-97.5)   | 87.0 (67.9-95.5)   |
|                            |                                  | <i>Bla<sub>KPC</sub></i> | 0                          | 1    | 2    | 20   | 0.0 (0.0-82.2)            | 95.2 (77.3-99.8)   | 87.0 (67.9-95.5)   |
| <i>K. pneumoniae</i> (236) | 72.8 (67.2-77.8)                 | <i>Bla<sub>NDM</sub></i> | 16                         | 31   | 5    | 213  | 76.2 (54.9-89.4)          | 87.3 (82.5-90.9)   | 86.4 (81.8-90.0)   |
|                            |                                  | <i>Bla<sub>KPC</sub></i> | 76                         | 28   | 4    | 157  | 95.0 (87.8-98.0)          | 84.9 (79.0-89.3)   | 87.9 (83.5-91.3)   |
|                            |                                  | <i>Bla<sub>IMP</sub></i> | 2                          | 5    | 1    | 257  | 66.7 (11.9-98.3)          | 98.1 (95.6-99.2)   | 97.7 (95.2-99.0)   |
|                            |                                  | <i>Bla<sub>VIM</sub></i> | 0                          | 2    | 0    | 263  | NA                        | 99.2 (97.3-99.9)   | 99.2 (97.3-99.9)   |
| <i>K. oxytoca</i> (8)      | 100.0 (70.1-100.0)               | <i>Bla<sub>NDM</sub></i> | 2                          | 0    | 0    | 7    | 100.0 (17.8-100.0)        | 100.0 (64.6-100.0) | 100.0 (70.1-100.0) |
|                            |                                  | <i>Bla<sub>KPC</sub></i> | 2                          | 0    | 0    | 7    | 100.0 (17.8-100.0)        | 100.0 (64.6-100.0) | 100.0 (70.1-100.0) |

|                          |                  |                           |   |   |   |   |                   |                    |                    |
|--------------------------|------------------|---------------------------|---|---|---|---|-------------------|--------------------|--------------------|
|                          |                  | <i>Bla</i> <sub>IMP</sub> | 1 | 0 | 0 | 8 | 100.0 (5.1-100.0) | 100.0 (67.6-100.0) | 100.0 (70.1-100.0) |
| <i>S. marcescens</i> (6) | 50.0 (18.8-81.2) | <i>Bla</i> <sub>NDM</sub> | 0 | 2 | 0 | 4 | NA                | 66.7 (30.0-94.1)   | 66.7 (30.0-94.1)   |
|                          |                  | <i>Bla</i> <sub>KPC</sub> | 0 | 1 | 0 | 5 | NA                | 83.3 (43.7-99.2)   | 83.3 (43.7-99.2)   |

---

3

4 NA, Not applicable.

5

6
